# Supplementary material for: Change of Health‐Related Quality of Life Over Time and Its Association With Patient Outcomes in Patients With Heart Failure
Source: PubMed Central journal article supplement — J Am Heart Assoc. 2020 Aug 19;9(17):e017278. doi: 10.1161/JAHA.120.017278 (PMC7660771; doi:10.1161/jaha.120.017278), 2020-08-19
Supplement: JAH3-9-e017278-s001.pdf [file JAH3-9-e017278-s001.pdf]

# **Supplemental Material**

**Table S1. Baseline Characteristics in Alberta HEART study groups.**

| <b>Patient Characteristics</b>               | <b>Controls<br/>N (%)</b> | <b>At-risk, N (%)</b>   | <b>HFpEF,<br/>N (%)</b>  | <b>HFrEF,<br/>N (%)</b>  | <b>Total<br/>N</b>      | <b>P</b> |
|----------------------------------------------|---------------------------|-------------------------|--------------------------|--------------------------|-------------------------|----------|
| <b>All</b>                                   | 98 (15.8)                 | 163 (26.2)              | 191 (30.8)               | 169 (27.2)               | 621                     |          |
| <b>Male</b>                                  | 38 (38.8)                 | 88 (54.0)               | 99 (51.8)                | 127 (75.1)               | 352 (56.7)              | <.0001   |
| <b>Age at enrollment,<br/>median(IQR)</b>    | 61.5 (53.0, 71.0)         | 64.0 (60.0, 72.0)       | 73.0 (63.0, 80.0)        | 64.0 (57.0, 72.0)        | 66.0 (59.0, 75.0)       | <.0001   |
| <b>NYHA Functional<br/>Classification, N</b> |                           |                         | 171                      | 159                      |                         | 0.3413   |
| Class I                                      | NA                        | NA                      | 41 (24.0)                | 38 (23.9)                |                         |          |
| Class II                                     | NA                        | NA                      | 86 (50.3)                | 76 (47.8)                |                         |          |
| Class III                                    | NA                        | NA                      | 44 (25.7)                | 42 (26.4)                |                         |          |
| Class IV                                     | NA                        | NA                      | 0 (0.0)                  | 3 (1.9)                  |                         |          |
| <b>Medical comorbidity</b>                   |                           |                         |                          |                          |                         |          |
| Atrial fibrillation                          | 2 (2.0)                   | 25 (15.3)               | 91 (47.6)                | 71 (42.0)                | 189 (30.4)              | <.0001   |
| Coronary artery disease                      | 1 (1.0)                   | 14 (8.6)                | 43 (22.5)                | 31 (18.3)                | 89 (14.3)               | <.0001   |
| Diabetes                                     | 0 (0.0)                   | 52 (31.9)               | 82 (42.9)                | 62 (36.7)                | 196 (31.6)              | <.0001   |
| COPD                                         | 0 (0.0)                   | 53 (32.5)               | 70 (36.6)                | 88 (52.1)                | 211 (34.0)              | <.0001   |
| <b>Lab measurements,<br/>median(IQR)</b>     |                           |                         |                          |                          |                         |          |
| Hemoglobin, g/dL (N=538)                     | 144.0 (133.0,<br>150.0)   | 144.0 (133.0,<br>151.0) | 134.0 (122.0,<br>145.0)  | 138.0 (128.0,<br>148.0)  | 139.5 (129.0,<br>149.0) | <.0001   |
| BNP, pg/mL (N=556)                           | 23.0 (13.0, 41.0)         | 30.0 (17.0, 58.0)       | 118.0 (59.0,<br>255.0)   | 173.0 (82.0,<br>364.0)   | 70.0 (26.5,<br>193.0)   | <.0001   |
| NT-proBNP, pg/mL (N=555)                     | 55.0 (27.9, 93.9)         | 9.0 (4.1, 21.1)         | 599.6 (198.7,<br>1403.0) | 963.3 (407.6,<br>2044.9) | 241.0 (66.0,<br>948.0)  | <.0001   |
| BMI (N=617)                                  | 25.4 (23.5, 29.4)         | 30.4 (26.5, 33.9)       | 30.4 (27.2, 34.9)        | 29.2 (26.4, 33.4)        | 29.4 (25.7, 33.5)       | <.0001   |
| <b>Signs and symptoms</b>                    |                           |                         |                          |                          |                         |          |
| Leg edema                                    | 1 (1.0)                   | 32 (19.6)               | 87 (45.5)                | 40 (23.7)                | 160 (25.8)              | <.0001   |
| Shortness of breath                          | 2 (2.0)                   | 50 (30.7)               | 123 (64.4)               | 97 (57.4)                | 272 (43.8)              | <.0001   |
| Fatigue                                      | 5 (5.1)                   | 48 (29.4)               | 116 (60.7)               | 100 (59.2)               | 269 (43.3)              | <.0001   |
| Heart sounds S3                              | 0 (0.0)                   | 2 (1.2)                 | 14 (7.3)                 | 28 (16.6)                | 44 (7.1)                | <.0001   |

|                                                  |                   |                   |                    |                     |                    |        |
|--------------------------------------------------|-------------------|-------------------|--------------------|---------------------|--------------------|--------|
| Elevated JVP                                     | 0 (0.0)           | 13 (8.0)          | 83 (43.5)          | 62 (36.7)           | 158 (25.4)         | <.0001 |
| PND                                              | 0 (0.0)           | 4 (2.5)           | 26 (13.6)          | 9 (5.3)             | 39 (6.3)           | <.0001 |
| PHJR                                             | 0 (0.0)           | 13 (8.0)          | 30 (15.7)          | 23 (13.6)           | 66 (10.6)          | 0.0002 |
| <b>Echocardiographic parameters, median(IQR)</b> |                   |                   |                    |                     |                    |        |
| LVEF, % (N=572)                                  | 64.9 (60.5, 67.5) | 64.3 (58.4, 69.0) | 59.0 (52.0, 65.3)  | 37.1 (27.8, 43.8)   | 58.3 (44.5, 65.5)  | <.0001 |
| LVEDVI, ml/m <sup>2</sup> (N=567)                | 50.1 (41.1, 60.0) | 46.3 (35.6, 59.8) | 51.5 (39.4, 66.1)  | 74.6 (58.7, 108.9)  | 54.0 (41.7, 71.5)  | <.0001 |
| LVMI, g/m <sup>2</sup> (N=588)                   | 68.7 (55.2, 80.7) | 79.7 (66.5, 98.0) | 91.7 (77.2, 115.2) | 115.6 (92.4, 141.4) | 90.1 (70.6, 114.9) | <.0001 |
| RVSP, mmHg (N=290)                               | 25.2 (22.1, 27.7) | 30.4 (25.8, 34.9) | 34.0 (28.4, 43.4)  | 35.0 (29.0, 46.1)   | 31.8 (26.4, 39.4)  | <.0001 |
| E/e' Average (N=519)                             | 8.2 (6.9, 9.8)    | 9.3 (7.7, 11.5)   | 12.6 (9.9, 15.5)   | 11.6 (8.8, 16.5)    | 10.1 (8.1, 13.6)   | <.0001 |
| <b>Medications</b>                               |                   |                   |                    |                     |                    |        |
| ACEi/ARB                                         | 3 (3.1)           | 124 (76.1)        | 158 (82.7)         | 153 (90.5)          | 438 (70.5)         | <.0001 |
| Betablocker                                      | 1 (1.0)           | 62 (38.0)         | 159 (83.2)         | 161 (95.3)          | 383 (61.7)         | <.0001 |
| Loop diuretic                                    | 0 (0.0)           | 15 (9.2)          | 131 (68.6)         | 103 (60.9)          | 249 (40.1)         | <.0001 |
| MRA (spironolactone)                             | 0 (0.0)           | 8 (4.9)           | 38 (19.9)          | 74 (43.8)           | 120 (19.3)         | <.0001 |
| Digoxin                                          | 0 (0.0)           | 2 (1.2)           | 19 (9.9)           | 30 (17.8)           | 51 (8.2)           | <.0001 |

All comparisons are across the five groups for available data, with the exception of NYHA Functional Classification that is compared between HFpEF and HFrEF groups only. COPD= chronic obstructive pulmonary disease; JVP=; LVEDVI: left ventricular end-diastolic volume index; LVEF: left ventricular ejection fraction; LVMI: left ventricular mass index; PHJR= Positive hepatojugular reflex; RVSP= right ventricle systolic pressure; E/e'= left ventricular filling pressure calculated by ratio between early mitral inflow velocity and mitral annular early diastolic velocity.

**Table S2. Availability of health status data at baseline and follow-up in the Alberta HEART cohort (n=621).**

|                                  | Patients with available KCCQ*, n | Patients with available FACT-Anemia, n | Patients with available EQ-5D, n |
|----------------------------------|----------------------------------|----------------------------------------|----------------------------------|
| Baseline                         | 555                              | 458                                    | 521                              |
| 6 months                         | 347                              | 323                                    | 339                              |
| 12 months                        | 415                              | 364                                    | 372                              |
| Baseline and 6 months            | 332                              | 280                                    | 310                              |
| Baseline and 12 months           | 392                              | 310                                    | 342                              |
| Baseline, 6 months and 12 months | 320                              | 260                                    | 287                              |

\*both components are missing at the same time; KCCQ: Kansas City Cardiomyopathy Questionnaire.

**Table S3. Baseline characteristics by availability of KCCQ Overall Summary Score in the Alberta HEART cohort of 621 participants.**

| <b>Participants Characteristics</b>      | <b>Missing KCCQ data at baseline and 12 month, N (%)</b> | <b>KCCQ data only available at baseline, N (%)</b> | <b>Available baseline and 12 months KCCQ data, N (%)</b> | <b>P*</b> |
|------------------------------------------|----------------------------------------------------------|----------------------------------------------------|----------------------------------------------------------|-----------|
| <b>All</b>                               | 66 (10.6)                                                | 163 (26.2)                                         | 392 (63.1)                                               |           |
| <b>AB Heart group</b>                    |                                                          |                                                    |                                                          | <.0001    |
| Control                                  | 20 (30.3)                                                | 52 (31.9)                                          | 26 (6.6)                                                 |           |
| At risk                                  | 22 (33.3)                                                | 34 (20.8)                                          | 107 (27.3)                                               |           |
| HFpEF                                    | 14 (21.2)                                                | 36 (22.1)                                          | 141 (36.0)                                               |           |
| HFrEF                                    | 10 (15.2)                                                | 41 (25.2)                                          | 118 (30.1)                                               |           |
| <b>Male</b>                              | 24 (36.4)                                                | 86 (52.8)                                          | 242 (61.7)                                               | 0.0003    |
| <b>Age at enrollment, median(IQR)</b>    | 63.5 (59.0, 76.0)                                        | 65.0 (57.0, 74.0)                                  | 67.0 (59.0, 76.0)                                        | 0.374     |
| <b>NYHA Functional Classification, N</b> | 0                                                        | 77                                                 | 253                                                      | 0.0201    |
| Class I                                  | NA                                                       | 13 (16.9)                                          | 66 (26.1)                                                |           |
| Class II                                 | NA                                                       | 34 (44.2)                                          | 128 (50.6)                                               |           |
| Class III                                | NA                                                       | 28 (36.4)                                          | 58 (22.9)                                                |           |
| Class IV                                 | NA                                                       | 2 (2.6)                                            | 1 (0.4)                                                  |           |
| <b>Medical comorbidity</b>               |                                                          |                                                    |                                                          |           |
| Atrial fibrillation                      | 15 (22.7)                                                | 31 (19.0)                                          | 143 (36.5)                                               | <.0001    |
| Coronary artery disease                  | 5 (7.6)                                                  | 25 (15.3)                                          | 59 (15.1)                                                | 0.2525    |
| Diabetes                                 | 19 (28.8)                                                | 44 (27.0)                                          | 133 (33.9)                                               | 0.2434    |
| COPD                                     | 15 (22.7)                                                | 48 (29.4)                                          | 148 (37.8)                                               | 0.0212    |
| <b>Lab measurements, median(IQR)</b>     |                                                          |                                                    |                                                          |           |
| Hemoglobin, g/dL (N=538#)                | 135.0 (127.0, 145.5)                                     | 140.0 (130.0, 148.0)                               | 140.0 (129.0, 150.0)                                     | 0.4777    |
| BNP, pg/mL (N=556)                       | 47.0 (19.0, 245.0)                                       | 56.0 (24.0, 160.0)                                 | 83.0 (30.0, 198.0)                                       | 0.127     |
| NT-proBNP,pg/mL (N=555)                  | 116.7 (46.5, 678.3)                                      | 170.0 (57.9, 770.4)                                | 334.1 (77.8, 1099.4)                                     | 0.0118    |
| BMI (N=617)                              | 29.5 (24.1, 33.0)                                        | 28.5 (24.7, 32.9)                                  | 29.5 (26.5, 34.2)                                        | 0.0328    |
| <b>Signs and symptoms</b>                |                                                          |                                                    |                                                          |           |
| Leg edema                                | 13 (19.7)                                                | 21 (12.9)                                          | 126 (32.1)                                               | <.0001    |

|                                                  |                    |                    |                    |        |
|--------------------------------------------------|--------------------|--------------------|--------------------|--------|
| Shortness of breath                              | 22 (33.3)          | 54 (33.1)          | 196 (50.0)         | 0.0002 |
| Fatigue                                          | 17 (25.8)          | 52 (31.9)          | 200 (51.0)         | <.0001 |
| Heart sounds S3                                  | 1 (1.5)            | 8 (4.9)            | 35 (8.9)           | 0.0427 |
| Elevated JVP                                     | 11 (16.7)          | 34 (20.9)          | 113 (28.8)         | 0.0325 |
| PND                                              | 7 (10.6)           | 8 (4.9)            | 24 (6.1)           | 0.2676 |
| PHJR                                             | 0 (0.0)            | 8 (4.9)            | 58 (14.8)          | <.0001 |
| <b>Echocardiographic parameters, median(IQR)</b> |                    |                    |                    |        |
| LVEF, % (N=572)                                  | 63.9 (57.6, 66.9)  | 60.5 (46.0, 66.6)  | 56.5 (42.7, 64.4)  | 0.0004 |
| LVEDVI, ml/m <sup>2</sup> (N=567)                | 49.8 (42.1, 64.2)  | 57.7 (47.5, 75.4)  | 52.6 (40.0, 70.9)  | 0.0052 |
| LVMI, g/m <sup>2</sup> (N=588)                   | 80.8 (68.3, 105.0) | 92.1 (72.3, 120.0) | 90.2 (70.4, 114.6) | 0.0913 |
| RVSP, mmHg (N=290)                               | 29.1 (24.2, 36.0)  | 32.1 (26.7, 41.3)  | 32.0 (26.8, 39.8)  | 0.257  |
| E/e' Average (N=519)                             | 10.0 (8.2, 13.1)   | 9.8 (8.0, 13.0)    | 10.3 (8.1, 13.7)   | 0.466  |

\*All characteristics are compared across the three groups, with the exception of NYHA Functional Classification that is compared between two groups restricted to HF participants with NYHA available; COPD: chronic obstructive pulmonary disease; E/e': left ventricular filling pressure; JVP: jugular vein pressure; KCCQ: Kansas City Cardiomyopathy Questionnaire; LVEDVI: left ventricular end-diastolic volume index; LVEF: left ventricular ejection fraction; LVMI: left ventricular mass index; N: number; OSS: KCCQ Overall Summary Score; PHJR: Positive hepatojugular reflex; RVSP: right ventricle systolic pressure.

**Table S4. Health status measurements at baseline and 12 months using KCCQ, EQ-5D and FACT-Anemia.**

|                     | <b>Controls</b> | <b>At-risk</b> | <b>HFpEF</b> | <b>HFrEF</b> | <b>p</b> |
|---------------------|-----------------|----------------|--------------|--------------|----------|
| <b>Baseline</b>     |                 |                |              |              |          |
| KCCQ CSS, N         | 78              | 141            | 177          | 159          |          |
| Mean ± SD           | 96.9 (9.3)      | 88.7 (16.1)    | 70.6 (21.1)  | 74.9 (21.4)  | <.0001   |
| KCCQ OSS, N         | 78              | 141            | 177          | 159          |          |
| Mean ± SD           | 97.2 (7.2)      | 88.4 (17.0)    | 69.5 (20.9)  | 71.7 (22.0)  | <.0001   |
| FACT-Anemia, N      | 45              | 106            | 161          | 146          |          |
| Mean ± SD           | 166.9 (19.5)    | 151.4 (24.2)   | 132.2 (28.9) | 133.0 (32.2) | <.0001   |
| EQ-5D, N            | 81              | 130            | 161          | 149          |          |
| Mean ± SD           | 86.1 (12.7)     | 76.9 (15.4)    | 67.0 (17.7)  | 65.6 (18.7)  | <.0001   |
| <b>12-month F/U</b> |                 |                |              |              |          |
| KCCQ CSS, N         | 32              | 114            | 150          | 119          |          |
| Mean ± SD           | 99.1 (2.3)      | 89.7 (14.3)    | 69.7 (21.2)  | 76.0 (20.4)  | <.0001   |
| KCCQ OSS, N         | 32              | 114            | 150          | 119          |          |
| Mean ± SD           | 99.3 (1.9)      | 89.8 (13.8)    | 68.8 (22.1)  | 72.5 (21.9)  | <.0001   |
| FACT-Anemia, N      | 15              | 98             | 142          | 109          |          |
| Mean ± SD           | 175.2 (10.7)    | 151.8 (23.9)   | 132.5 (31.2) | 136.5 (29.5) | <.0001   |
| EQ-5D, N            | 30              | 98             | 134          | 110          |          |
| Mean ± SD           | 90.1 (7.2)      | 77.7 (16.3)    | 64.4 (20.4)  | 67.4 (19.8)  | <.0001   |

CSS: KCCQ Clinical Summary Score; EQ-5D: EuroQOL five dimensions questionnaire; FACT-An: Functional Assessment of Cancer Therapy—Anemia; HFpEF: heart failure with preserved ejection fraction; HFrEF: Heart failure with reduced ejection fraction; KCCQ: Kansas City Cardiomyopathy Questionnaire; N: number; OSS: KCCQ Overall Summary Score; SD: standard deviation.

**Table S5. The change of NYHA functional class in patients with HF with and without reduced ejection fraction.**

|                                    | <b>All HF,<br/>N=360</b> | <b>HFpEF,<br/>N=191</b> | <b>HFrEF,<br/>N=169</b> | <b>p</b> |
|------------------------------------|--------------------------|-------------------------|-------------------------|----------|
| <b>NYHA change in 12 months, N</b> | 274                      | 148                     | 126                     |          |
| +2 NYHA class                      | 3 (1.1)                  | 3 (2.0)                 | 0 (0.0)                 | 0.2281   |
| +1 NYHA class                      | 40 (14.6)                | 23 (15.5)               | 17 (13.5)               |          |
| No change                          | 137 (50.0)               | 75 (50.7)               | 62 (49.2)               |          |
| -1 NYHA class                      | 81 (29.6)                | 43 (29.1)               | 38 (30.2)               |          |
| -2 NYHA class                      | 13 (4.7)                 | 4 (2.7)                 | 9 (7.1)                 |          |

HF: heart failure; HFpEF: heart failure with preserved ejection fraction; HFrEF: Heart failure with reduced ejection fraction; N: number; NYHA: New York Heart Association functional class.



**Table S6. Predictors for change in KCCQ Overall Summary Score between baseline and 12m in patients with HF.**

|                         | Linear Regression Estimate (95% CI)<br>(N=518 KCCQ OSS records from 259 patients) | P      | Mixed model Estimate (95% CI)<br>(N=595 KCCQ OSS records from 336 patients) | P      | n missing         |
|-------------------------|-----------------------------------------------------------------------------------|--------|-----------------------------------------------------------------------------|--------|-------------------|
| HFpEF vs HFrEF          | 0.66 (-4.42 , 5.73)                                                               | 0.7994 | 0.65 (-3.98 , 5.27)                                                         | 0.7846 | 0                 |
| Age                     | -0.04 (-0.21 , 0.13)                                                              | 0.617  | -0.04 (-0.20 , 0.11)                                                        | 0.6035 | 0                 |
| Male vs Female          | 1.37 (-2.98 , 5.71)                                                               | 0.5374 | 1.24 (-2.82 , 5.30)                                                         | 0.5499 | 0                 |
| Ethnicity               |                                                                                   |        |                                                                             |        | 0                 |
| Caucasian               | Ref                                                                               |        | Ref                                                                         |        |                   |
| Aboriginal              | -8.03 (-24.43 , 8.37)                                                             | 0.3371 | -8.15 (-21.58 , 5.28)                                                       | 0.2342 |                   |
| South Asian             | -2.89 (-15.75 , 9.97)                                                             | 0.6599 | -2.74 (-14.49 , 9.01)                                                       | 0.6478 |                   |
| Other                   | 5.28 (-3.53 , 14.09)                                                              | 0.2401 | 5.46 (-2.38 , 13.31)                                                        | 0.1724 |                   |
| Atrial fibrillation     | -1.52 (-5.25 , 2.22)                                                              | 0.4257 | -1.54 (-5.00 , 1.93)                                                        | 0.3847 | 0                 |
| Coronary artery disease | -4.03 (-7.72 , -0.33)                                                             | 0.0329 | -4.04 (-7.44 , -0.65)                                                       | 0.0196 | 0                 |
| Diabetes                | -0.99 (-5.10 , 3.12)                                                              | 0.6358 | -0.91 (-4.66 , 2.85)                                                        | 0.636  | 0                 |
| COPD                    | -5.81 (-10.21 , -1.42)                                                            | 0.0095 | -5.79 (-9.86 , -1.72)                                                       | 0.0053 | 0                 |
| Baseline KCCQ OSS score | -0.27 (-0.36 , -0.17)                                                             | <.0001 | -0.27 (-0.35 , -0.18)                                                       | <.0001 | 0                 |
| BMI                     | -0.19 (-0.48 , 0.11)                                                              | 0.219  | -0.19 (-0.45 , 0.08)                                                        | 0.1719 | 2/595<br>(0.3)    |
| Leg edema               | -0.23 (-4.34 , 3.88)                                                              | 0.9113 | -0.23 (-3.98 , 3.51)                                                        | 0.9033 | 0                 |
| Shortness of breath     | -0.94 (-4.80 , 2.92)                                                              | 0.6339 | -0.93 (-4.44 , 2.57)                                                        | 0.6019 | 0                 |
| Fatigue                 | -0.78 (-4.67 , 3.11)                                                              | 0.6929 | -0.76 (-4.33 , 2.80)                                                        | 0.6749 | 0                 |
| Heart sounds S3         | -1.57 (-6.77 , 3.63)                                                              | 0.5542 | -1.57 (-6.50 , 3.36)                                                        | 0.5327 | 0                 |
| Elevated JVP            | -3.83 (-7.79 , 0.12)                                                              | 0.0575 | -3.84 (-7.47 , -0.21)                                                       | 0.0383 | 0                 |
| PND                     | -0.56 (-7.02 , 5.90)                                                              | 0.8647 | -0.63 (-6.58 , 5.32)                                                        | 0.8356 | 0                 |
| PHJR                    | 1.51 (-3.25 , 6.28)                                                               | 0.5336 | 1.53 (-2.99 , 6.05)                                                         | 0.5081 | 0                 |
| Hemoglobin per 1g/dL    | 0.00 (-0.14 , 0.14)                                                               | 0.9935 | 0.02 (-0.11 , 0.14)                                                         | 0.8151 | 102/595<br>(17.1) |

|                                               |        |                       |        |                       |        |                   |
|-----------------------------------------------|--------|-----------------------|--------|-----------------------|--------|-------------------|
| BNP per 10 pg/mL<br>at baseline               |        | 0.10 (-0.06 , 0.26)   | 0.2042 | 0.10 (-0.03 , 0.24)   | 0.1426 | 57/595<br>(9.6)   |
|                                               | Change | 0.06 (-0.11 , 0.23)   | 0.5012 | 0.06 (-0.07 , 0.19)   | 0.3751 | 37/259<br>(14.3)  |
| NTproBNP per 100 pg/mL<br>at baseline         |        | -1.01 (-2.65 , 0.74)  | 0.2251 | -0.97 (-2.35 , 0.42)  | 0.1705 | 60/595<br>(10.1)  |
|                                               | change | -1.57 (-3.41 , 0.32)  | 0.0946 | -1.55 (-3.00 , -0.11) | 0.0355 | 38/259<br>(14.7)  |
| LVEF per 1%<br>at baseline                    |        | -0.18 (-0.42 , 0.05)  | 0.1301 | -0.18 (-0.38 , 0.03)  | 0.0872 | 56/595<br>(9.4)   |
|                                               | change | -0.25 (-0.46 , -0.05) | 0.017  | -0.25 (-0.41 , -0.09) | 0.0019 | 53/259<br>(20.5)  |
| LVEDVI per 1 ml/m <sup>2</sup><br>at baseline |        | -0.08 (-0.21 , 0.04)  | 0.2073 | -0.08 (-0.19 , 0.03)  | 0.1624 | 58/595<br>(9.7)   |
|                                               | change | -0.05 (-0.17 , 0.06)  | 0.3803 | -0.05 (-0.14 , 0.04)  | 0.2856 | 51/259<br>(19.7)  |
| LVMI per 1 g/m <sup>2</sup><br>at baseline    |        | 0.04 (-0.04 , 0.12)   | 0.2874 | 0.04 (-0.03 , 0.11)   | 0.2385 | 28/595<br>(4.7)   |
|                                               | change | 0.04 (-0.03 , 0.12)   | 0.2582 | 0.04 (-0.01 , 0.10)   | 0.1239 | 19/259<br>(7.3)   |
| E/e' Average<br>at baseline                   |        | 0.05 (-0.32 , 0.41)   | 0.8011 | 0.05 (-0.28 , 0.37)   | 0.7666 | 124/595<br>(20.4) |
|                                               | change | 0.05 (-0.26 , 0.35)   | 0.7544 | 0.05 (-0.19 , 0.28)   | 0.6863 | 79/259<br>(30.5)  |

The linear regression modelled changes in KCCQ OSS as follows:

$$\Delta KCCQ OSS_i = \alpha_0 + \alpha_1 KCCQ OSS_{Baseline,i} + \alpha_2 BNP_{Baseline,i} + \alpha_3 \Delta BNP_i + \dots + \varepsilon_i$$

Changes in response and predictors were evaluated between baseline and 12 month. The model was estimated using data on HF participants with KCCQ OSS available at baseline and 12 month (N=259).

The mixed model modelled KCCQ OSS at baseline and 12 month as follows:

$$KCCQ\ OSS_{Baseline,i} = c_i + \alpha_0 + \alpha_1 KCCQ\ OSS_{Baseline,i} + \alpha_2 BNP_{Baseline,i} + \dots + \varepsilon_{Baseline,i}$$

$$KCCQ\ OSS_{12\ month,i} = c_i + b_0 + b_1 KCCQ\ OSS_{Baseline,i} + b_2 BNP_{Baseline,i} + b_3 \Delta BNP_i + \dots + \varepsilon_{12\ month,i}$$

Changes in response and predictors were evaluated between baseline and 12 month. The model was estimated using data on HF participants with KCCQ OSS available at baseline (N=336).

Missing predictors were imputed (hemoglobin, BNP at baseline, BNP at 12 month, NTproBNP at baseline, NTproBNP at 12 month, EF at baseline, EF at 12 month, LVEDVI at baseline, LVEDVI at 12 month, LV mass index at baseline, LV mass index at 12 month, E/e' average at baseline, E/e' average at 12 month, NYHA at baseline, NYHA at 12 month, creatinine, systolic blood pressure). BMI: body mass index; BNP: brain-type natriuretic peptide; CI: confidence interval; COPD: chronic obstructive pulmonary disease; E/e': the ratio of transmitral Doppler early filling velocity to tissue Doppler early diastolic mitral annular velocity; HFpEF: heart failure with preserved ejection fraction; HFrEF: heart failure with reduced ejection fraction; JVP: jugular vein distension; KCCQ: Kansas City Cardiomyopathy Questionnaire; OSS: KCCQ Overall Summary Score; LVEDVI: left ventricular end-diastolic volume index; LVEF: left ventricular ejection fraction; LVMI: left ventricular mass index; PHJR: Positive hepatojugular reflex; NT-proBNP: Amino-terminal brain-type natriuretic peptide; NYHA: New York Heart Association functional class; PND: paroxysmal nocturnal dyspnea.

**Table S7. Baseline, Follow-up and change over 12 months in those with decreased, unchanged, or increased KCCQ.**

|                                 | 12 month F/U             |                        |                          | P      |
|---------------------------------|--------------------------|------------------------|--------------------------|--------|
|                                 | Decrease ( $\geq 5$ pts) | No change ( $< 5$ pts) | Increase ( $\geq 5$ pts) |        |
| HF, n                           | 84                       | 96                     | 79                       |        |
| KCCQ OSS Baseline, median (IQR) | 79 (59, 89)              | 82 (56, 93)            | 62 (47, 79)              | <.0001 |
| KCCQ OSS 12 month, median (IQR) | 60 (40, 75)              | 82 (56, 95)            | 81 (66, 92)              | <.0001 |
| KCCQ OSS Change, median (IQR)   | -14 (-19, -9)            | 0 (-1, 3)              | 13 (9, 21)               | <.0001 |
| HFpEF, n                        | 52                       | 50                     | 39                       |        |
| KCCQ OSS Baseline, median (IQR) | 78 (60, 85)              | 84 (60, 97)            | 57 (45, 74)              | <.0001 |
| KCCQ OSS 12 month, median (IQR) | 60 (43, 73)              | 84 (60, 97)            | 77 (63, 90)              | <.0001 |
| KCCQ OSS Change, median (IQR)   | -13 (-19, -10)           | 0 (-1, 3)              | 16 (9, 22)               | <.0001 |
| HFrEF, n                        | 32                       | 46                     | 40                       |        |
| KCCQ OSS Baseline, median (IQR) | 84 (59, 91)              | 79 (56, 91)            | 72 (50, 83)              | 0.038  |
| KCCQ OSS 12 month, median (IQR) | 62 (37, 76)              | 80 (56, 92)            | 85 (72, 92)              | 0.0001 |
| KCCQ OSS Change, median (IQR)   | -14 (-21, -9)            | 1 (-2, 3)              | 11 (7, 18)               | <.0001 |

F/U: follow-up; HF: heart failure; HFpEF: heart failure with preserved ejection fraction; HFrEF: Heart failure with reduced ejection fraction; IQR: interquartile range; KCCQ: Kansas City Cardiomyopathy Questionnaire; N: number; OSS: KCCQ Overall Summary Score; p: p-value.

**Table S8. Change of health-related quality of life based on change in NYHA functional class in Alberta HEART cohort.**

|                      | -2 NYHA class | -1 NYHA class | No change   | +1 NYHA class | +2 NYHA class | p      | Total       |
|----------------------|---------------|---------------|-------------|---------------|---------------|--------|-------------|
| <b>Heart Failure</b> |               |               |             |               |               |        |             |
| N                    | 12            | 70            | 126         | 35            | 3             |        | 246         |
| ΔKCCQ CSS            | 9.9 (24.1)    | 0.2 (14.9)    | -0.8 (12.7) | -2.2 (14.6)   | -7.8 (19.3)   | 0.1106 | -0.3 (14.5) |
| ΔKCCQ OSS            | 9.7 (19.7)    | 1.7 (14.9)    | -0.5 (13.1) | -2.8 (17.4)   | -11.5 (17.7)  | 0.0563 | 0.2 (14.8)  |
| N                    | 9             | 59            | 109         | 30            | 3             |        | 210         |
| ΔEQ-5D               | 15.0 (32.3)   | 0.8 (17.2)    | -1.7 (18.5) | -0.9 (21.7)   | -5.0 (5.0)    | 0.1648 | -0.2 (19.4) |
| N                    | 11            | 58            | 113         | 30            | 3             |        | 215         |
| ΔFACT-An             | 23.2 (30.4)   | 5.3 (19.5)    | -0.7 (17.9) | 0.3 (21.2)    | -12.6 (11.4)  | 0.0013 | 2.1 (20.2)  |
| <b>HFpEF</b>         |               |               |             |               |               |        |             |
| N                    | 4             | 36            | 68          | 20            | 3             |        | 131         |
| ΔKCCQ CSS            | -3.1 (19.9)   | 0.5 (15.9)    | -1.7 (13.5) | 0.1 (16.5)    | -7.8 (19.3)   | 0.8574 | -1.0 (14.8) |
| ΔKCCQ OSS            | 2.2 (10.2)    | 1.9 (14.9)    | -1.0 (13.4) | -0.3 (17.9)   | -11.5 (17.7)  | 0.5741 | -0.3 (14.5) |
| N                    | 3             | 29            | 58          | 17            | 3             |        | 110         |
| ΔEQ-5D               | 16.7 (46.2)   | -0.3 (15.7)   | -3.7 (18.8) | 2.8 (19.1)    | -5.0 (5.0)    | 0.3314 | -1.3 (18.9) |
| N                    | 4             | 30            | 58          | 17            | 3             |        | 112         |
| ΔFACT-An             | 25.9 (21.2)   | 3.7 (19.8)    | -3.7 (18.2) | 2.0 (25.0)    | -12.6 (11.4)  | 0.0287 | -0.0 (20.4) |
| <b>HFrEF</b>         |               |               |             |               |               |        |             |
| N                    | 8             | 34            | 58          | 15            | 0             |        | 115         |
| ΔKCCQ CSS            | 16.3 (24.5)   | -0.1 (14.1)   | 0.1 (11.8)  | -5.1 (11.6)   | na            | 0.005  | 0.5 (14.2)  |
| ΔKCCQ OSS            | 13.4 (22.8)   | 1.4 (15.1)    | 0.2 (12.8)  | -6.1 (16.6)   | na            | 0.0309 | 0.6 (15.2)  |
| N                    | 6             | 30            | 51          | 13            | 0             |        | 100         |
| ΔEQ-5D               | 14.2 (28.5)   | 1.9 (18.8)    | 0.7 (18.1)  | -5.6 (24.7)   | na            | 0.2547 | 1.0 (20.0)  |
| N                    | 7             | 28            | 55          | 13            | 0             |        | 103         |
| ΔFACT-An             | 21.6 (36.2)   | 7.0 (19.4)    | 2.5 (17.2)  | -2.1 (15.6)   | na            | 0.05   | 4.4 (19.8)  |

All HRQoL scores are provided as mean ± standard deviation; Δ: change; EQ-5D: EuroQOL five dimensions questionnaire; FACT-An: Functional Assessment of Cancer Therapy—Anemia; HFpEF: heart failure with preserved ejection fraction; HFrEF: Heart failure with reduced ejection fraction; KCCQ: Kansas City Cardiomyopathy Questionnaire; CSS: KCCQ Clinical Summary Score; OSS: KCCQ Overall Summary Score; N: number; NYHA: New York Heart Association functional class.

**Table S9. Patients in Alberta HEART according to the baseline KCCQ overall summary score and change over 12 months.**

|                                  | N   | Low baseline KCCQ OSS & decreased | Low baseline KCCQ OSS & unchanged | Low baseline KCCQ OSS & increased | Normal baseline KCCQ OSS & decreased | Normal baseline KCCQ OSS & unchanged | Normal baseline KCCQ OSS & increased |
|----------------------------------|-----|-----------------------------------|-----------------------------------|-----------------------------------|--------------------------------------|--------------------------------------|--------------------------------------|
| All Alberta HEART subjects, n(%) | 392 | 7 (1.8)                           | 10 (2.5)                          | 20 (5.1)                          | 97 (24.8)                            | 179 (45.6)                           | 79 (20.2)                            |
| All HF, n(%)                     | 259 | 7 (2.7)                           | 10 (3.8)                          | 17 (6.6)                          | 77 (29.7)                            | 86 (33.2)                            | 62 (24.0)                            |
| HFrEF, n(%)                      | 118 | 1 (0.8)                           | 5 (4.2)                           | 8 (6.8)                           | 31 (26.3)                            | 41 (34.7)                            | 32 (27.2)                            |
| HFpEF, n(%)                      | 141 | 6 (4.3)                           | 5 (3.5)                           | 9 (6.4)                           | 46 (32.6)                            | 45 (31.9)                            | 30 (21.3)                            |

HF: heart failure; HFpEF: heart failure with preserved ejection fraction; HFrEF: heart failure with reduced ejection fraction; KCCQ: Kansas City Cardiomyopathy Questionnaire; N: number; OSS: KCCQ Overall Summary Score; Baseline KCCQ was defined as low or normal when baseline KCCQ was <45 and ≥45, respectively. The cutpoint of 5 was used to determine change over 12 months.

Figure S1. The change in KCCQ Clinical Summary Score over 12 months follow-up in patients from different subgroups (N=392).

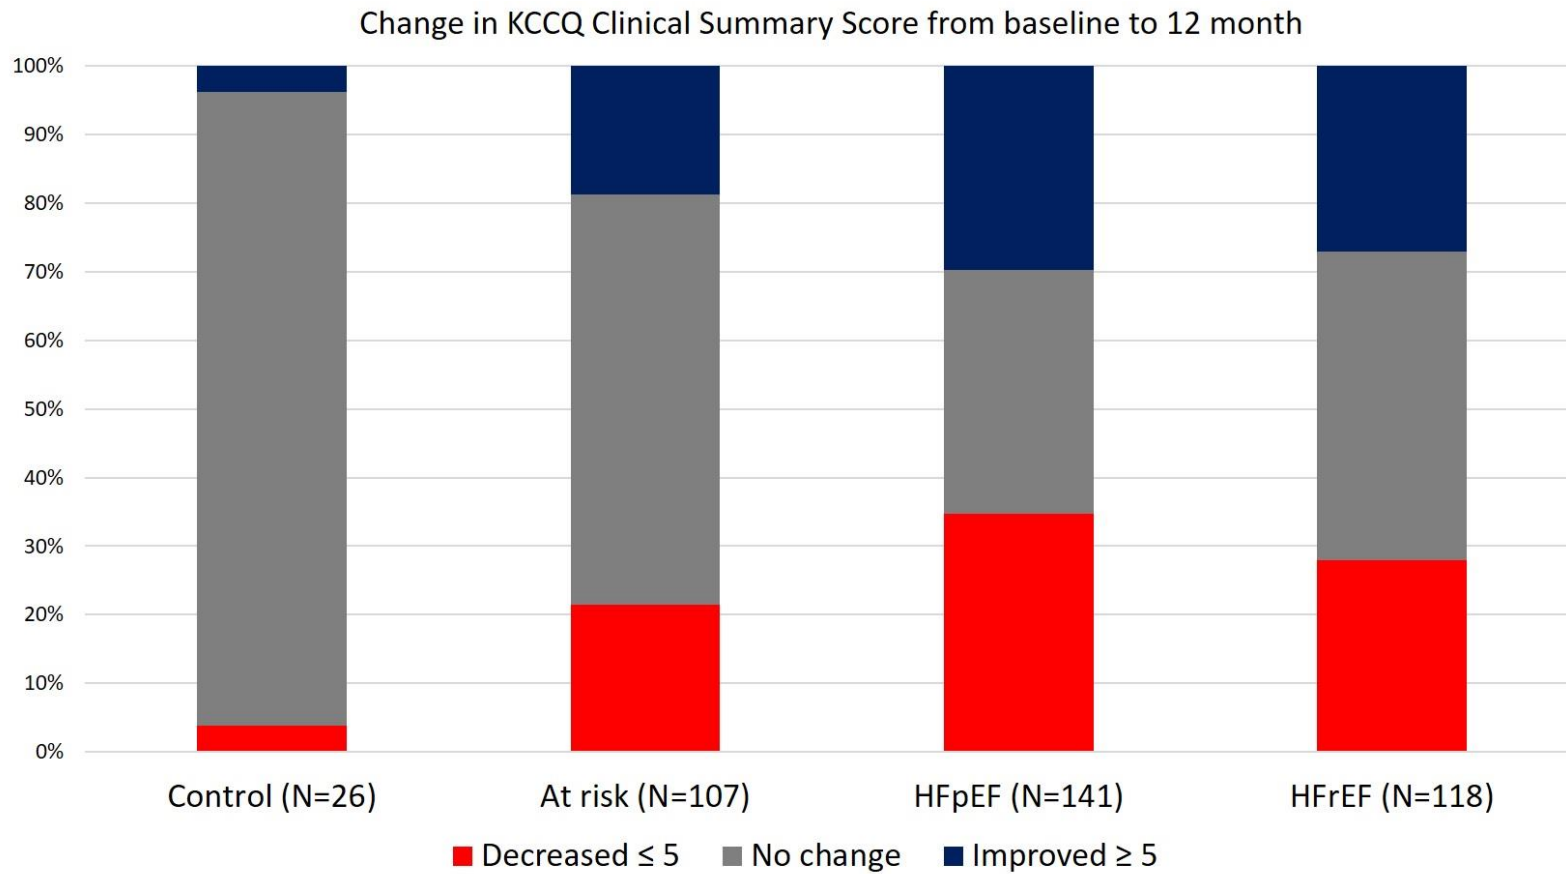

HFpEF: heart failure with preserved ejection fraction; HFrEF: Heart failure with reduced ejection fraction; KCCQ: Kansas City Cardiomyopathy Questionnaire; N: number.
